# Supplementary material for: Synthetic studies on ecteinascidin 743: rapid access to the fully functionalized tetrahydroisoquinoline with a bridged 10-membered sulfur containing macrocycleElectronic supplementary information (ESI) available: spectroscopic data for all new compounds and X-ray data for compound 14. See http://www.rsc.org/suppdata/cc/b3/b309824a/
Source: Royal Society of Chemistry journal article supplement (doi:10.1039/b309824a), 2003-01-01
Supplement: b309824a.doc [file b309824a.doc]

# Supplementary information

Synthetic Studies on Ecteinascidin 743: Rapid Access to the Fully Functionalized Tetrahydroisoquinoline with a Bridged 10-member Sulfur Containing Macrocycle

Michael De Paolis, Angèle Chiaroni, Jieping Zhu*

Institut de Chimie des Substances Naturelles, CNRS, 91198 Gif-sur-Yvette cedex, France.

zhu@icsn.cnrs-gif.fr

**Compound 10:** mp = 95 °C; IR(CHCl3) 3603, 3345, 2885, 1463, 1272, 1089 cm-1; 1H NMR (200 MHz CDCl3, 293 K)  6.49 (1H, d, *J* = 10.0 Hz), 6.20 (1H, d, *J* = 10.0 Hz), 5.90 (2H, s), 2.13 (3H, s); 13C NMR (62.5 MHz CDCl3, 293 K) 149.3, 146.5, 140.5, 107.9, 106.2, 105.0, 100.7, 8.6 ; LRMS (IE+) m/z: (M)+ 152.0.

**Compound 11:** D2 3 -10 (*c* 0.4, CHCl3 )**;** IR(CHCl3) 3242, 1651, 1468, 1406 cm-1;1H NMR(250 MHz CDCl3, 293 K) 8.39 (1H, s br), 6.62 (1H, s br), 6.31 (1H, s), 5.86 (1H, d, *J* = 1.0 Hz), 5.84 (1H, d, *J* = 1.0 Hz), 4.66 (1H, d, *J* = 8.4 Hz), 4.32 (1H, m), 3.64 (2H, m), 2.08 (3H, s), 1.57 (3H, s), 1.51 (9H, s), 1.47 (3H, s); 13C NMR (62.5 MHz CDCl3, 293 K) 155.8, 149.8, 146.6, 139.6, 114.8, 109.3, 105.4, 100.8, 94.7, 82.2, 80.2, 65.1, 62.4, 28.3 (3C), 27.0 (2C), 8.6; LRMS (ESI-) m/z: (M-H)- 380.1, (2M-H)- 761.4

**Compound 12:** D2 3 -97 (*c* 4.05, CHCl3 )**;** IR (CHCl3) 3447, 2986, 2305, 1705, 1265 cm-1**;** 1H NMR (250 MHz CDCl3, 293 K) 6.76 (1H, s), 6.07 (1H, ddt, *J* = 17.1, 10.5, 5.1 Hz), 5.90 (1H, d, *J* = 1.1 Hz), 5.85 (1H d, *J* = 1.1 Hz), 5.47 (1H, ddt, *J* = 17.1, 1.1 Hz), 5.37 (1H, d, *J* = 1.6 Hz), 5.30 (2H, m), 4.38 (2H, m), 4.23 (dd, 1H, *J* = 11.7, 1.9 Hz), 3.80 (1H, dd, *J* = 11.8, 1.9 Hz), 3.60 (1H, m), 2.17 (3H, s), 1.55 (3H, s), 1.51 (3H, s) ; 13C NMR (62.5 MHz CDCl3, 293 K)154.8, 149.4, 145.6, 142.6, 133.9, 124.0, 116.2, 112.3, 104.4, 100.7, 99.3, 78.5, 73.9, 68.3, 64.9, 48.0, 29.6 (2C), 28.3 (3C), 9.5; HRMS(ESI+) m/z: calculated C22 H31 N O7 Na (M+Na)+ 444.1998, found 444.1964

**Compound 7:** D2 3 -93 (*c* 4.8, CHCl3 )**;** IR(CHCl3) 2941, 1474, 1089 cm-1; 1H NMR (300 MHz CDCl3, 293 K) 6.81 (1H, s), 6.11 (1H, ddt, *J* = 17.1, 10.6, 5.3 Hz), 5.94 (1H, d, *J* = 1.3 Hz), 5.93 (1H, d, *J* = 1.3 Hz), 5.46 (1H, dq, *J* = 17.1, 1.5 Hz), 5.28 (1H, dq, *J* = 10.8, 1.5 Hz), 5.26 (1H, d br), 4.35 (1H, ddt, *J* = 12.8, 5.1, 1.4 Hz), 4.27-4.21 (2H, m), 3.83 (1H, dd, *J* = 11.7, 1.7 Hz), 2.80 (1H, m), 2.17 (3H, s), 1.53 (3H, s), 1.51 (3H, s) ; 13C NMR (62.5 MHz CDCl3, 293 K) 149.1, 146.3, 143.6, 134.2, 125.4, 117.3, 113.6, 105.1, 101.6, 99.6, 74.5, 70.3, 66.5, 49.0, 30.0, 18.9, 10.0 ; LRMS (EI+) m/z: (M)+ 321.0 ; HRMS(ESI+) m/z: calculated C17 H23 N O5 Na (M+Na)+ 344.1473, found 344.1474

**Compound 13 :** mp = 122 °C; D2 3 +24 (*c* 1.9, CHCl3 ); IR(CHCl3) 2985, 1746, 1475, 1157, 1092 cm-1; 1H NMR (300 MHz CDCl3, 293 K) 6.08 (1H, ddt, *J* = 17.3, 10.8, 5.5 Hz), 5.95 (1H, d br), 5.90 (1H, d, *J* = 1.3 Hz), 5.46 (1H, dq, *J* = 17.5, 2.8 Hz), 5.28 (1H, dq, *J* = 10.9, 1.3 Hz), 5.06 (1H, d, *J* = 1.4 Hz), 4.79 (1H, s), 4.52 (1H, ddt, *J* = 12.4, 5.2, 1.4 Hz), 4.29 - 4.22 (4H, m), 3.93 (1H, dd, *J* = 12.4, 1.3 Hz), 2.93 (1H, m), 2.15 (3H, s), 1.60 (3H, s), 1.39 (3H, s), 1.27 (3H, t, *J* = 7.3 Hz) ; 13C NMR (75 MHz CDCl3, 293 K) 171.3, 151.2, 146.2, 139.8, 133.8, 120.5, 116.4, 113.2, 112.6, 101.4, 98.8, 75.0, 64.5, 61.0, 60.0, 54.5, 46.3, 29.8, 18.7, 13.9, 9.3 ; LRMS (ESI+) m/z: (M+H)+ 405.9, (M+Na)+ 428.0 ; HRMS(ESI+) m/z: calculated C21 H27 N O7 Na (M+Na)+ 428.1685, found 428.1651**.**

**Compound 14:** mp = 152 °C; D2 3 +37 (*c* 2.3, CHCl3 ); IR (CHCl3) 2994, 1731, 1456, 1384, 1168, 1097 cm-1; 1H NMR (250 MHz CDCl3, 293 K) 5.94 (1H, d, *J* = 1.2 Hz), 5.87 (1H, d, *J* = 1.2 Hz), 4.92 (1H, d, *J* = 3.0 Hz), 4.76 (1H, s), 4.33 (1H, dd, *J* = 12.4, 4.3 Hz); 4.21 (2H, q, *J* = 7.1 Hz), 3.86 (1H, dd, *J* = 12.4, 2.9 Hz), 3.14 (1H, m), 2.12 (3H, s), 1.64 (3H, s), 1.42 (3H, s), 1.28 (3H, t, *J* = 7.1 Hz); 13C NMR(62.5 MHz CDCl3, 293 K) 171.4, 148.9, 146.2, 137.8, 112.3, 111.9, 108.5, 101.2, 99.5, 63.8, 61.6, 61.5, 54.6, 47.1, 28.3, 20.05, 14.1, 8.55; HRMS(ESI+) m/z: calculated C18 H23 N O7 Na (M+Na)+ 388.1372, found 388.1345

**Compound 15:** D2 3 -1.4 (*c* 0.36, CHCl3 )**;** IR(CHCl3) 3018, 1738, 1458, 1382, 1223, 1103 cm-1; 1H NMR (300 MHz CDCl3, 293 K) 6.11 (1H, ddt, *J* = 16.9, 10.3, 5.5 Hz), 5.94 (1H, d, *J* = 1.2 Hz), 5.91 (1H, d, *J* = 1.2 Hz), 5.43 (1H, dq, *J* = 17.1, 2.8 Hz), 5.27 (1H, dq, *J* = 10.9, 1.3 Hz), 5.09 (1H, d, *J* = 1.0 Hz), 4.71 (1H, s), 4.56 (1H, ddt, *J* = 12.5, 5.3, 1.7 Hz), 4.32-4.28 (3H, m), 4.24 (1H, m), 3.94 (1H, dd, *J* = 11.4, 1.1 Hz), 2.53 (1H, m), 2.15 (3H, s), 1.66 (3H, s), 1.44 (3H, s), 1.32 (3H, t); 13C NMR(62.5 MHz CDCl3, 293 K)171.2, 151.2, 146.4, 139.3, 133.9, 120.9, 116.3, 113.1, 112.8, 101.2, 98.8, 75.2, 64.6, 61.4, 60.1, 57.5, 49.3, 29.6, 18.7, 13.9, 9.1; HRMS(ESI+) m/z: calculated C21 H27 N O7 Na (M+Na)+ 428.1685, found 428.1714

**Compound 6:** mp 193°C;D2 3 -12 (*c* 1.6, CHCl3 )**;** IR(CHCl3) 3432, 2997, 1728, 1456, 1383, 1101 cm-1; 1H NMR (250 MHz CD3OD, 293 K) 6.10 (1H, ddt, *J* = 17.3, 10.5, 5.4 Hz), 5.98 (1H, d, *J* = 1.0 Hz), 5.93 (1H, d, *J* = 1.0 Hz), 5.42 (1H, ddt, *J* = 17.2, 3.4, 1.75 Hz), 5.23 (1H, ddt, *J* = 10.4, 3.2, 1.5 Hz), 5.15 (1H, d, , *J* = 1.5 Hz), 4.51 (1H, ddt, *J* = 12.6, 5.0, 1.5 Hz), 4.40-4.30 (2H, m,), 4.24 (1H, ddt, *J* = 12.5, 5.3, 1.7 Hz), 4.02 (1H, t br, *J* = 3.1 Hz), 3.93 – 3.82 (2H, m), 2.55 (1H, m), 2.12 (3H, s), 1.61 (3H, s), 1.35 (3H, s); 13C NMR (62.5 MHz CDCl3, 293 K)151.4, 146.5, 139.3, 133.9, 122.1, 116.7, 115.7, 112.8, 101.1, 99.0, 75.4, 64.9, 63.8, 61.0, 55.4, 49.3, 29.9, 18.9, 9.2; LRMS (EI+) m/z: (M)+ 363.0 ; HRMS(ESI+) m/z: calculated C19 H25 N O6 Na (M+Na)+ 386.1580, found 386.1582**.**

**Compound 16:** D2 3 + 5 (*c* 1.0, CHCl3 )**;** IR(CHCl3) 3422, 2928, 1739, 1383, 1102 cm-1; 1H NMR (300 MHz CDCl3, 293 K) 7.28 (15H, m), 6.10 (1H, ddt, *J* = 16.8, 10.2, 5.1 Hz), 5.90 (2H, s), 5.59 (1H, d, *J* = 8.1 Hz), 5.48 (1H, m), 5.28 (1H, dq, *J* = 10.3, 1.3 Hz), 5.08 (1H, d, *J* = 1.0 Hz), 4.83 (1H, dd, *J* = 11.1, 6.4 Hz), 4.71 (1H, d, *J* = 11.8 Hz), 4.61 (1H, d, *J* = 12.0 Hz), 4.60- 4.50 (3H, m), 4.40 (1H, m), 4.30-4.20 (3H, m), 3.93 (1H, dd br, *J* = 11.2 , 1.5 Hz), 2.66 (2H, m), 2.55 (1H, m br), 2.17 (3H, s), 1.60 (3H, s), 1.38 (3H, s); 13C NMR (62.5 MHz CDCl3, 293 K) 169.7, 153.5, 151.4, 146.5, 144.1(3C), 139.2, 133.8, 129.3 (6C), 127.9 (6C), 126.8(3C), 121.4, 116.6, 113.7, 113.0, 101.2, 98.9, 95.3, 75.4, 74.4, 67.0, 66.3, 64.2, 60.6, 53.0, 52.5, 49.2, 33.7, 29.9, 18.9, 9.2; LRMS (ESI+) m/z: (M+H)+ 883.2, (M+Na)+ 905.2, (M+K)+ 921.2.

**Compound 5:** D2 3 + 18 (*c* 0.8, CHCl3 )**;** IR (CHCl3) 3422, 2929, 1735, 1508, 1336, 1101 cm-1; 1H NMR (300 MHz CDCl3, 293 K) 6.11 (1H, m), 6.09 (1H, d, *J* = 1.0 Hz), 6.03 (1H, d, *J* = 7.5 Hz), 5.98 (1H, d, *J* = 1.0 Hz), 5.49 (1H, m), 5.31 (1H, m), 5.16 (1H, dd br, *J* = 11.2 Hz), 4.74 (2H, s), 4.6-4.50 (4H, m), 4.45 (1H, dd br, *J* = 11.2 Hz), 4.25 (1H, ddt br, *J* =11.9, 5.4 Hz), 3.73 - 3.68 (2H, m), 3.1 (1H, dd, *J* = 15.1, 3.5 Hz), 3.01 (1H, m), 2.39 (1H, dd, *J* = 15.1, 2.1 Hz), 2.2 (3H, s); 13C NMR (62.5 MHz CDCl3, 293 K)171.3, 153.8, 150.6, 146.5, 139.5, 133.4, 120.6, 117.7, 115.0, 112.8, 101.7, 74.7, 74.0, 65.9, 64.2, 57.2, 54.7, 54.4, 41.9, 32.8, 29.7, 9.8**;** HRMS (ESI+) m/z: calculated C22 H26 N2 O8 S Cl3 (M+H)+ 583.0475, found 583.0489

**X-ray structure analysis of compound 14 .**


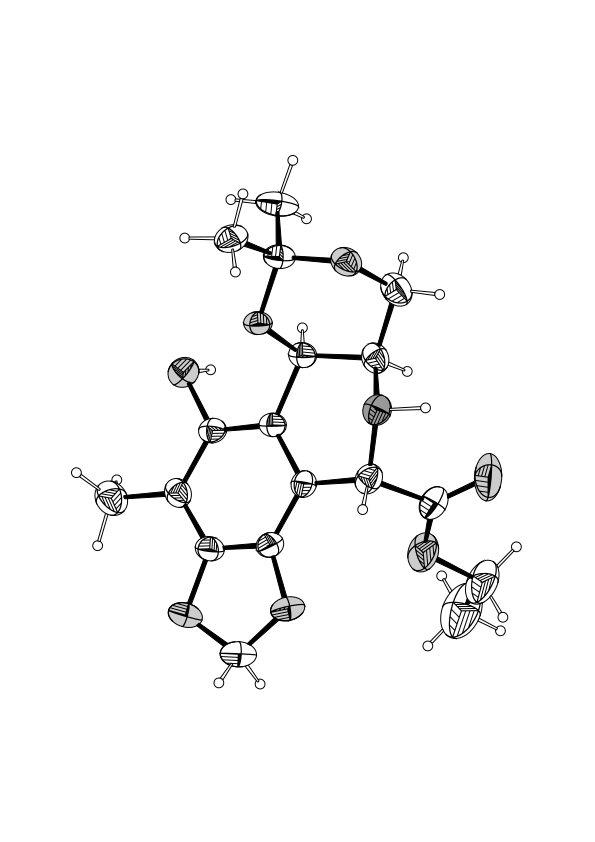


The molecule is seen in the Figure. The absolute configuration has been deduced from the known configuration in the starting material. The molecular conformation is perfectly established.

Crystallographic data. Colourless crystal of 0.075 x 0.20 x 0.80 mm. C18 H23 N O7, Mw = 365.37. Orthorhombic system, space group P 212121 , Z = 4 : four molecules in the unit-cell of parameters : a = 5.513 (6), b = 12.528 (14), c = 26.192 (23) Å, V = 1809 Å3, dc = 1.342 g cm-3, F(000) = 776, (Mo K) = 0.71073 Å,  = 0.104 mm-1.

Data were measured with a Nonius Kappa-CCD area-detector diffractometer, using graphite monochromated Mo Kradiation, in phi scans, up to  = 31.4°. So, a full sphere of 6899 data was collected leading to 4196 orthrhombic reflections, of which 2554 unique. 2135 reflections were considered as observed having I ≥ 2 sigma (I). The structure was solved by direct methods using program *SHELXS86* 1 and refined by full-matrix least-squares, based upon unique F2 with program *SHELXL93* 2 . The hydrogen atoms located in difference Fourier maps were fitted at theoretical positions and treated riding, except those fixed to N1 and O17 atoms, kept experimental. They were assigned an isotropic displacement parameter equivalent to 1.2 that one of the bonded atom. Thus, refinement converged to R1(F) = 0.0457 for the 2135 observed reflections and wR2(F2) = 0.1441 for all the 2554 data with a goodness-of-fit S factor of 1.072. The residual electron density was found between – 0.13 and 0.12 eÅ-3. In the crystal packing, the molecules are hydrogen bonded in chains through the hydroxyl groups O17-H and the nitrogen atomsN1 at (1+x, y, z) (distances O-H= 1.10Å, O17…N1= 2.997(3), HO17...N1 = 2.00 Å, angle O-H-N = 150.1°). Full crystallographic results have been deposited (CIF file) with the Cambridge Crystallographic Data Centre, U. K.

1) Sheldrick, G. M. (1990). *Acta Cryst*. A **46,** 467-473.

2) Sheldrick, G.M. (1993). *SHELXL93*. Program for the Refinement of Crystal Structures. University of Göttingen, Germany.

Table 1. Crystal data and structure refinement.

___________________________________________________________________________

Identification code Paolis02

Empirical formula C18 H23 N O7

Formula weight 365.37

Temperature 293(2) K

Wavelength 0.71073 A

Crystal system Orthorhombic

Space group P 212121

Unit cell dimensions a = 5.513(6) A alpha = 90 deg.

b = 12.528(14) A beta = 90 deg.

c = 26.19(2) A gamma = 90 deg.

Volume 1809(3) A^3

Z 4

Density (calculated) 1.342 Mg/m^3

Absorption coefficient 0.104 mm^-1

F(000) 776

Crystal size 0.80 x 0.20 x 0.075 mm

Theta range for data collection 1.55 to 31.35 deg.

Index ranges -6<=h<=6, -16<=k<=17, -31<=l<=27

Reflections collected 6899/4196

Independent reflections 2554 [R(int) = 0.024]

Reflections observed 2135

Absorption correction None

Refinement method Full-matrix least-squares on F^2

Data / restraints / parameters 2552 / 0 / 239

Goodness-of-fit on F^2 1.072

Final R indices [I>2sigma(I)] R1 = 0.0457, wR2 = 0.1042 (2135 data)

R indices (all data) R1 = 0.0620, wR2 = 0.1441 (2554 data)

Absolute structure parameter 0(2)

Largest diff. peak and hole 0.121 and -0.128 e.A^-3

Table 2. Atomic coordinates ( x 10^4) and equivalent isotropic

displacement parameters (A^2 x 10^3). U(eq) is defined

as one third of the trace of the orthogonalized Uij tensor.

________________________________________________________________

x y z U(eq)

________________________________________________________________

N(1) 1113(5) 8155(2) 9064(1) 56(1)

C(2) 3111(5) 8544(2) 9381(1) 55(1)

C(3) 4845(5) 9178(2) 9045(1) 45(1)

C(4) 5428(5) 8626(2) 8552(1) 42(1)

C(5) 7316(5) 9003(2) 8250(1) 44(1)

C(6) 7820(6) 8599(2) 7764(1) 52(1)

C(7) 6329(7) 7774(2) 7615(1) 58(1)

C(8) 4527(6) 7366(2) 7911(1) 57(1)

C(9) 3998(5) 7763(2) 8385(1) 48(1)

C(10) 1919(5) 7350(2) 8704(1) 54(1)

C(11) 2137(7) 9224(3) 9804(1) 71(1)

O(12) 1186(4) 10216(2) 9622(1) 59(1)

O(13) 3700(3) 10180(1) 8909(1) 47(1)

C(14) 2892(5) 10812(2) 9329(1) 53(1)

C(15) 1494(7) 11721(2) 9096(1) 64(1)

C(16) 5003(7) 11200(3) 9653(1) 79(1)

O(17) 8724(4) 9836(2) 8423(1) 57(1)

C(18) 9777(7) 9044(3) 7429(1) 75(1)

O(19) 6391(6) 7265(2) 7151(1) 89(1)

O(20) 3314(5) 6569(2) 7652(1) 86(1)

C(21) 4656(10) 6427(3) 7196(2) 103(2)

C(22) 2449(7) 6288(2) 8973(1) 63(1)

O(23) 1694(6) 6076(2) 9383(1) 116(1)

O(24) 3846(5) 5664(2) 8720(1) 95(1)

C(25) 4316(9) 4608(3) 8925(2) 105(2)

C(26) 6506(10) 4244(4) 8744(3) 146(2)

HN1 -200 7800 9302 68

H(2) 3975(5) 7933(2) 9528(1) 66

H(3) 6347(5) 9319(2) 9233(1) 54

H(10) 565(5) 7220(2) 8470(1) 65

H(11A) 865(7) 8838(3) 9981(1) 85

H(11B) 3424(7) 9366(3) 10048(1) 85

H(15A) 2537(11) 12118(9) 8873(6) 80

H(15B) 906(29) 12181(9) 9362(1) 80

H(15C) 147(21) 11444(3) 8906(6) 80

H(16A) 6049(22) 11640(14) 9450(3) 98

H(16B) 5898(23) 10598(3) 9779(7) 98

H(16C) 4394(7) 11608(15) 9936(5) 98

HO17 10125 9400 8640 72

H(18A) 11299(10) 9019(16) 7606(3) 94

H(18B) 9399(21) 9771(6) 7343(7) 94

H(18C) 9885(28) 8628(11) 7122(4) 94

H(21A) 3570(10) 6437(3) 6905(2) 124

H(21B) 5478(10) 5742(3) 7203(2) 124

H(25A) 4352(9) 4638(3) 9295(2) 126

H(25B) 3033(9) 4123(3) 8823(2) 126

H(26A) 6818(34) 3545(13) 8879(12) 182

H(26B) 7772(13) 4722(17) 8850(12) 182

H(26C) 6457(25) 4212(29) 8378(3) 182

________________________________________________________________

Table 3. Bond lengths [A] and angles [deg].

______________________________________________

N(1)-C(10) 1.450(4)

N(1)-C(2) 1.464(4)

C(2)-C(11) 1.498(5)

C(2)-C(3) 1.522(4)

C(3)-O(13) 1.450(3)

C(3)-C(4) 1.500(4)

C(4)-C(5) 1.390(4)

C(4)-C(9) 1.407(4)

C(5)-O(17) 1.378(3)

C(5)-C(6) 1.398(4)

C(6)-C(7) 1.377(4)

C(6)-C(18) 1.499(5)

C(7)-C(8) 1.360(5)

C(7)-O(19) 1.373(4)

C(8)-C(9) 1.370(4)

C(8)-O(20) 1.380(4)

C(9)-C(10) 1.509(4)

C(10)-C(22) 1.533(4)

C(11)-O(12) 1.430(4)

O(12)-C(14) 1.425(4)

O(13)-C(14) 1.427(3)

C(14)-C(15) 1.505(4)

C(14)-C(16) 1.520(4)

O(19)-C(21) 1.425(5)

O(20)-C(21) 1.417(5)

C(22)-O(23) 1.181(4)

C(22)-O(24) 1.284(4)

O(24)-C(25) 1.451(4)

C(25)-C(26) 1.374(6)

C(10)-N(1)-C(2) 111.7(2)

N(1)-C(2)-C(11) 109.9(3)

N(1)-C(2)-C(3) 108.5(2)

C(11)-C(2)-C(3) 110.9(3)

O(13)-C(3)-C(4) 106.2(2)

O(13)-C(3)-C(2) 108.7(2)

C(4)-C(3)-C(2) 113.1(3)

C(5)-C(4)-C(9) 120.3(3)

C(5)-C(4)-C(3) 119.6(3)

C(9)-C(4)-C(3) 120.1(3)

O(17)-C(5)-C(4) 119.5(3)

O(17)-C(5)-C(6) 117.5(3)

C(4)-C(5)-C(6) 123.0(3)

C(7)-C(6)-C(5) 114.3(3)

C(7)-C(6)-C(18) 122.9(3)

C(5)-C(6)-C(18) 122.8(3)

C(8)-C(7)-O(19) 110.4(3)

C(8)-C(7)-C(6) 123.8(3)

O(19)-C(7)-C(6) 125.8(3)

C(7)-C(8)-C(9) 122.4(3)

C(7)-C(8)-O(20) 110.3(3)

C(9)-C(8)-O(20) 127.2(3)

C(8)-C(9)-C(4) 116.2(3)

C(8)-C(9)-C(10) 122.6(3)

C(4)-C(9)-C(10) 121.2(3)

N(1)-C(10)-C(9) 110.7(2)

N(1)-C(10)-C(22) 111.3(3)

C(9)-C(10)-C(22) 114.0(3)

O(12)-C(11)-C(2) 112.3(2)

C(14)-O(12)-C(11) 113.1(2)

C(14)-O(13)-C(3) 115.2(2)

O(12)-C(14)-O(13) 109.3(2)

O(12)-C(14)-C(15) 106.1(2)

O(13)-C(14)-C(15) 105.4(2)

O(12)-C(14)-C(16) 111.9(3)

O(13)-C(14)-C(16) 111.7(2)

C(15)-C(14)-C(16) 112.1(3)

C(7)-O(19)-C(21) 104.6(3)

C(8)-O(20)-C(21) 104.6(3)

O(20)-C(21)-O(19) 109.2(3)

O(23)-C(22)-O(24) 123.0(3)

O(23)-C(22)-C(10) 123.1(3)

O(24)-C(22)-C(10) 113.9(3)

C(22)-O(24)-C(25) 118.1(3)

C(26)-C(25)-O(24) 109.4(4)

_____________________________________________________________

Table 5. Anisotropic displacement parameters (A^2 x 10^3).

The anisotropic displacement factor exponent takes the form:

-2 pi^2 [ h^2 a*^2 U11 + ... + 2 h k a* b* U12 ]

_______________________________________________________________________

U11 U22 U33 U23 U13 U12

_______________________________________________________________________

N(1) 52(2) 53(1) 63(2) 4(1) 1(1) 2(1)

C(2) 59(2) 58(2) 48(2) 8(2) -3(2) 8(2)

C(3) 48(2) 45(2) 43(2) -2(1) -9(1) 8(1)

C(4) 46(2) 39(1) 40(2) -3(1) -9(1) 8(1)

C(5) 48(2) 39(1) 46(2) -2(1) -8(1) 9(1)

C(6) 59(2) 52(2) 45(2) 6(2) 0(1) 11(2)

C(7) 87(2) 44(2) 43(2) -5(1) -3(2) 9(2)

C(8) 84(2) 40(2) 48(2) -1(1) -7(2) -3(2)

C(9) 58(2) 39(1) 46(2) 5(1) -5(1) 4(1)

C(10) 56(2) 47(2) 60(2) 7(2) -10(2) -2(2)

C(11) 82(3) 78(2) 52(2) 5(2) 1(2) 15(2)

O(12) 62(1) 63(1) 53(1) -6(1) 7(1) 10(1)

O(13) 55(1) 41(1) 44(1) -8(1) -3(1) 6(1)

C(14) 53(2) 53(2) 53(2) -16(2) 2(2) 3(2)

C(15) 69(2) 48(2) 75(2) -11(2) 4(2) 8(2)

C(16) 70(2) 94(3) 72(2) -43(2) -8(2) -3(2)

O(17) 51(1) 58(1) 63(1) 2(1) -14(1) -3(1)

C(18) 77(3) 82(2) 67(2) 1(2) 14(2) 12(2)

O(19) 145(2) 70(2) 52(1) -21(1) 12(2) -9(2)

O(20) 134(2) 56(1) 67(2) -19(1) -5(2) -25(2)

C(21) 176(5) 69(2) 65(3) -24(2) 4(3) -20(3)

C(22) 62(2) 47(2) 79(3) 9(2) 1(2) 0(2)

O(23) 153(3) 78(2) 117(2) 44(2) 60(2) 27(2)

O(24) 131(2) 51(1) 102(2) 20(1) 32(2) 29(2)

C(25) 120(4) 55(2) 139(4) 30(2) 21(3) 21(2)

C(26) 126(4) 98(3) 213(6) 43(4) 43(5) 35(3)

_______________________________________________________________________
